# Supplementary material
Source: Springer Nature journal article supplement (https://www.springermedizin.de/resource/supplementary/12913_2013_3031_MOESM2_ESM.pdf/9533356)
Supplement: MOESM2 [file 9533356]

ACEI monotherapy

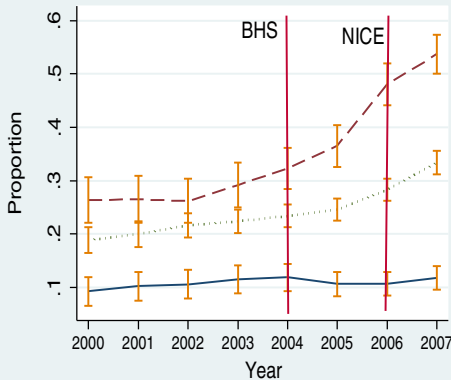

Beta blockers monotherapy

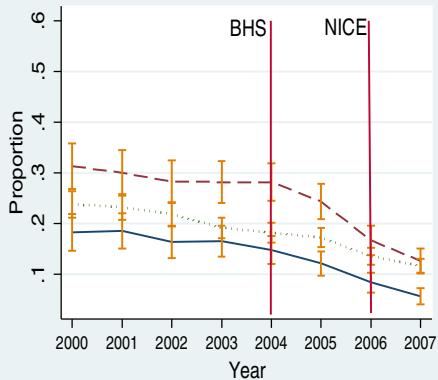

Calcium channels blockers monotherapy

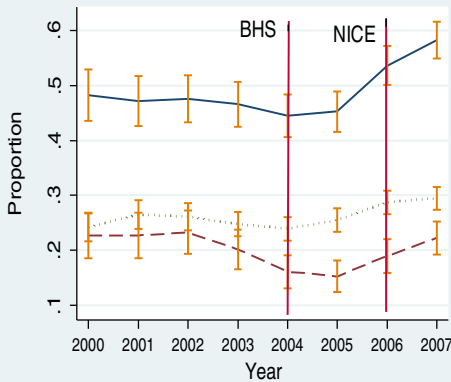

Diuretic monotherapy

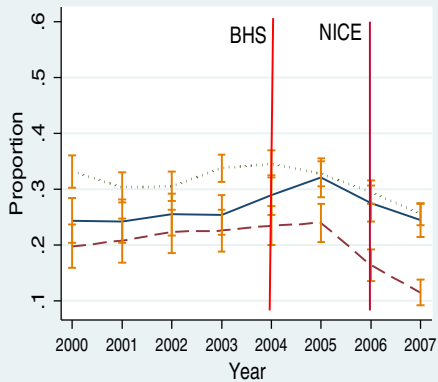

Black patients

Younger non-black patients

Older non-black patients

95% CI
